# Supplementary material for: Oncogenic p53 induces mitotic errors in lung cancer cells by recopying DNA replication forks conferring targetable proliferation advantage
Source: Research Square preprint supplement (doi:10.21203/rs.3.rs-7303237/v1), 2025-08-13
Supplement: Supplementary file 1 [file 4066e25372377a11ed10c720.docx]

**Table S1. Misaligned chromosomes, nuclei associated micronuclei, and nuclear size counted in the PDXs (Fig. 5)**
